# Supplementary material for: DNA binding with a minimal scaffold: structure–function analysis of Lig E DNA ligases
Source: PubMed Central journal article supplement (PMC6144786; doi:10.1093/nar/gky622), 2018-07-11
Supplement: gky622_supplemental_files.pdf [file gky622_supplemental_files.pdf]

## Supplementary information

Sup. Figure 1

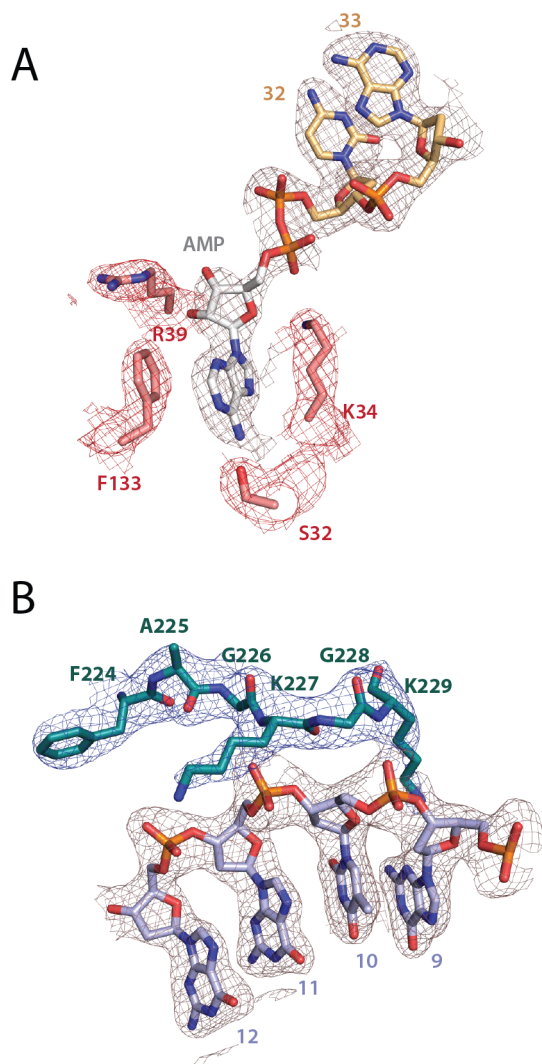

Supplementary figure 1. Observed electron density maps for Ame-Lig bound to DNA.  $2Fo - Fc$  maps are displayed at  $1.0\sigma$ . (A) Adenylated nicked DNA (grey mesh, gold/ white sticks) in the active site of Ame-Lig (red mesh, salmon sticks). (B) Interaction site of the OB-domain GKGK motif (blue mesh, teal sticks) with complement-strand DNA (grey mesh, purple sticks).



Sup. Figure 3

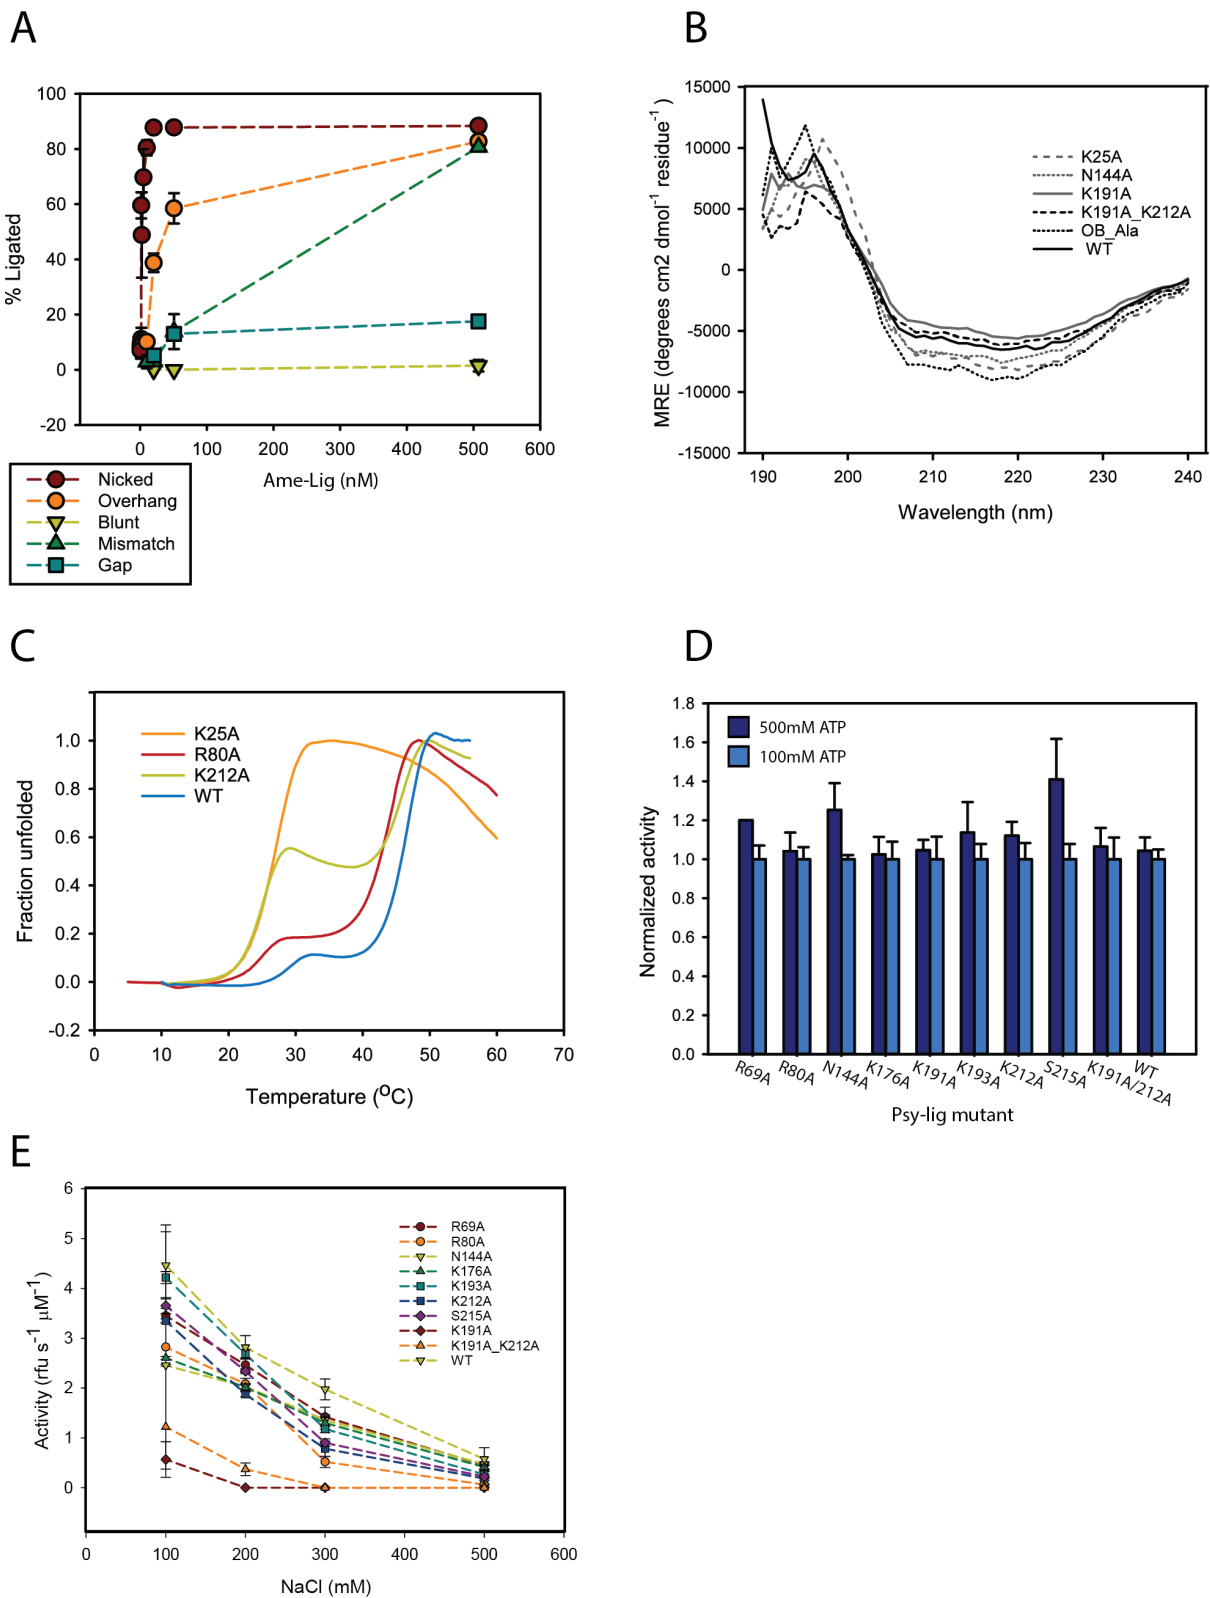

Supplementary figure 3. A) Ligase activity of Ame-Lig on various double-stranded substrates measured by denaturing urea-PAGE endpoint assay as described in (12). Nick and overhang substrates were tested for 15 minutes at 25 °C, other substrates were assayed at 15 °C for 2 hours (mismatch) or 6 hours (gapped and blunt). B) Representative CD spectra of Psy-Lig mutants. Data for remaining mutants is essentially identical. C) DSF unfolding data normalized to fraction folded for representative Psy-Lig mutants in the absence of added cofactor or substrate. D) Relative ligase activities of Psy-Lig mutants

measured by molecular beacon assay under standard (100 mM ATP) or high (500 mM) ATP conditions. E) Activities of *Psy-Lig* mutants with different concentrations NaCl measured by real-time molecular beacon assay.

#### Sup. Figure 4

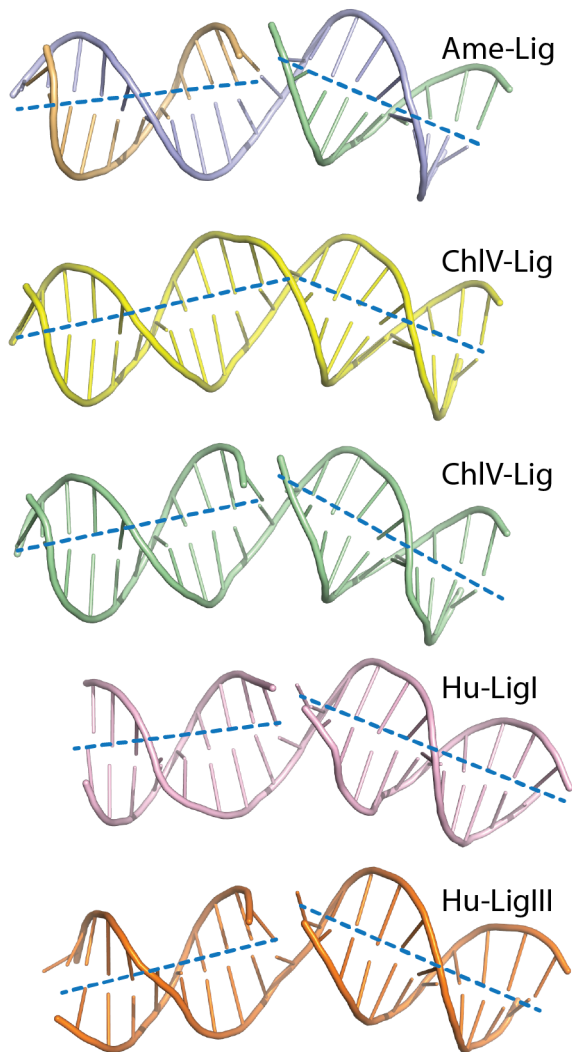

Supplementary figure 4. Cartoon representations of ligase-bound DNA showing the extent of bending. PDB files are as follows: *Ame-Lig*, 6gdr; *ChIV-Lig linear*, 2q2u; *ChIV-Lig nicked* 2q2t; *Hu-Lig1*, 3l2p; *Hu-lig3*, 1x9n.

Sup. Figure 6

Ame-Lig   
ChIV-Lig   
Hu-Lig1 

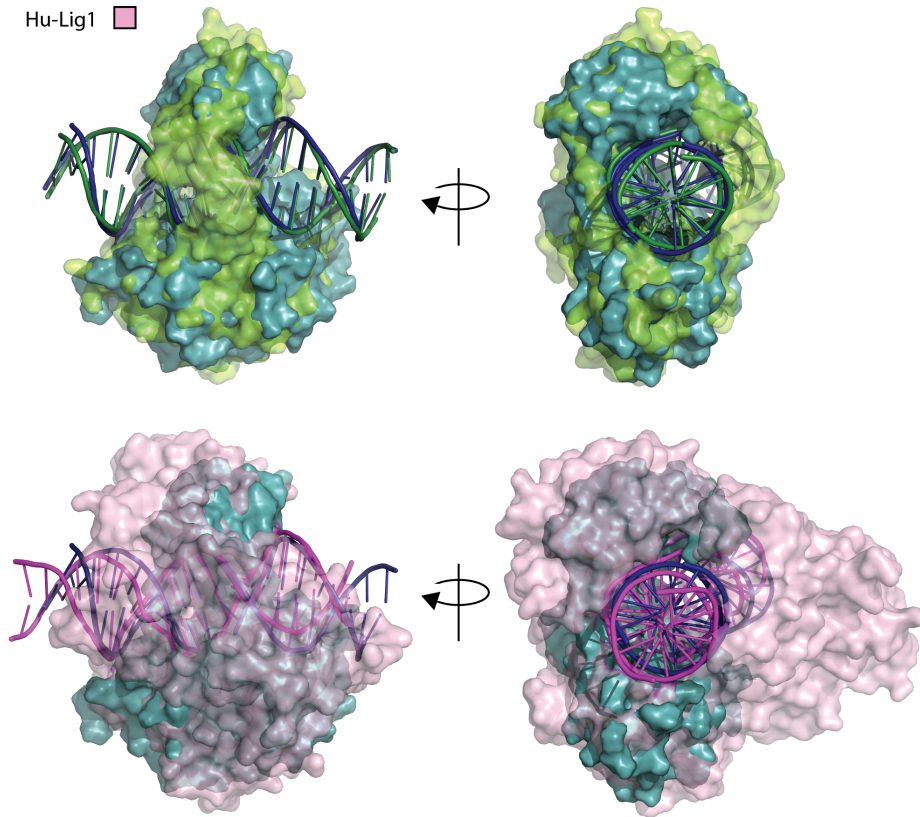

*Supplementary figure 5. Superimposition of Ame-Lig with the larger ChIV-Lig (upper) and Hu-Lig1 (lower) highlighting the complete encirclement of DNA by the latter structures. DNA is coloured dark blue for Ame-Lig, green for ChIV-Lig and dark pink for Hu-Lig1.*

## Sup. Figure 5

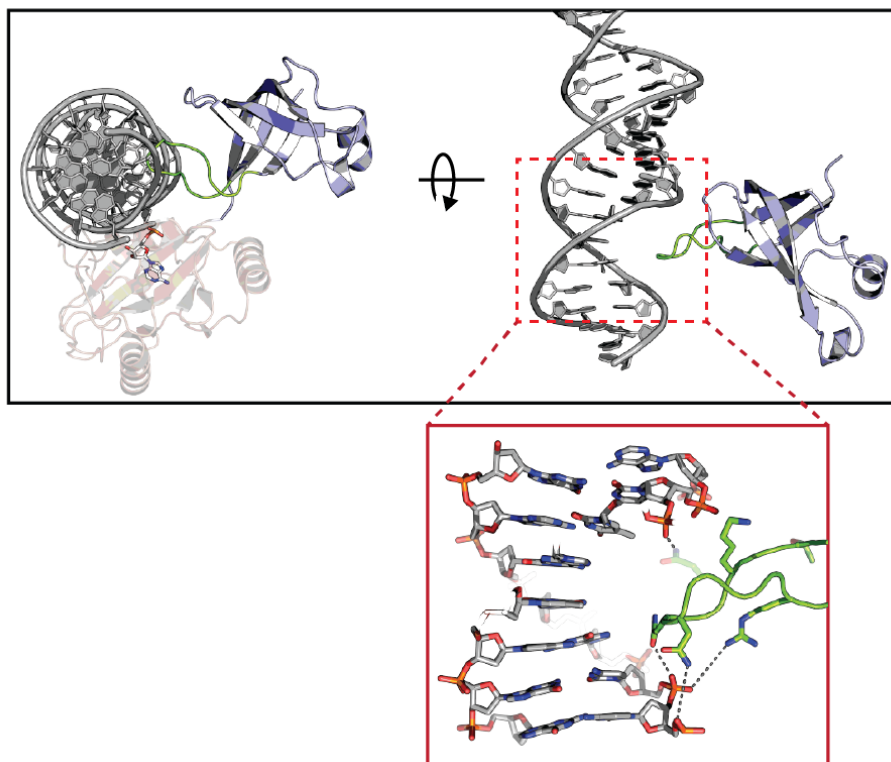

Supplementary figure 6. Superposition of the B conformation of the Psy-Lig enzyme-adenylate with the DNA-bound form of Ame-Lig by alignment of the ligase AD-domains. This places a loop on the back of the Psy-Lig OB domain (green) in the major groove of the DNA.

## Sup. Table 1

Supplementary Table 1. Oligonucleotides used in experimental work. All were purchased from Sigma as reversed HPLC quality.

| Purpose        | Name               | Sequence                                   | Modification |
|----------------|--------------------|--------------------------------------------|--------------|
| Psy-lig R69A   | R69A_FD            | atggcgagttatggattgctgctcaacagttcgaaacg     |              |
|                | R69A_BK            | cggttcgaactgtgagcagcaatccataactcgccat      |              |
| Psy-lig K191A  | K191A_BK           | cacctaacagaccttcatattgacctgcaccggcaatagg   |              |
|                | K191A_FD           | cctattgccgggtgaggcaaatatgaaggtctgttagtg    |              |
| Psy-lig K193A  | K193A_BK           | cacctaacagaccttcatatgcgcttaccggcaatagg     |              |
|                | K193A_FD           | cctattgccgggtaaaggcgcatatgaaggtctgttagtg   |              |
| Psy-lig K212A  | K212A_BK           | gagaatccagagccgattgcaaggttacgccttcctc      |              |
|                | K212A_FD           | gaggaaggcgtaaccttcgcaatcggtctggattctc      |              |
| Psy-lig S215A  | S215A_BK           | ctcatcggagaatccagcgccgatttgaaggta          |              |
|                | S215A_FD           | taacctcaaaatcggcgctggattcctcgatgag         |              |
| Psy-lig K25A   | K25A_FD            | cgcacgaattccatcaagtgcctcactcacgtagtactgt   |              |
|                | K25A_BK            | acagtactacgtgagtgaggcactgatggaattcgtgcg    |              |
| Psy-lig R80A   | R80A_corr_FD       | ctgattatcctgcgtggcagcaatgccgtaacg          |              |
|                | R80A_corr_BK       | cgtagcggcattgctgccacgcaggataatcag          |              |
| Psy-lig N144A  | N144A_FD           | ttcccatgacgacctggcagtaagtgaacagtg          |              |
|                | N144A_BK           | gcactgttcgactactggccaaggtcgatgggcaa        |              |
| Psy-lig K176A  | K176_FD            | tcgcttcggcatcctcaaatgccttcagtttcatcagatcac |              |
|                | K176_BK            | gtgatctgatgaactgaaggcatttgaggatccgaagcga   |              |
| Ame-Lig D-Loop | Ama_5' fragment_FD | gctcgggccccaaataat                         |              |

|                                   |                      |                                          |                               |
|-----------------------------------|----------------------|------------------------------------------|-------------------------------|
|                                   | Ama_5' fragment_BK   | accggatccaacaatgcttgcgg                  |                               |
|                                   | Ama_3' fragment_FD   | gcattgttgatccggtgcaac                    |                               |
|                                   | Ama_3' fragment_BK   | cgcagaagcttgcgcaaacg                     |                               |
| Nicked duplex for crystallization | Oligo1_Xtal_21_5P    | cac tat cgg aa                           | 5' Phosphate                  |
|                                   | Oligo_2Xtal_21_3OH   | att gcg acc                              |                               |
|                                   | Oligo_3Xtal_21_compl | ttc cga tag tgg ggt cgc aat              |                               |
| MST / EMSA assay                  | MST_5-prime_nick     | tccgaattcgagctccgctcg                    | 5' Phosphate                  |
|                                   | MST_3-prime_nick     | aggccatggctgatatcgga                     | 5' FAM (6-Carboxyfluorescein) |
|                                   | EMSA_linear          | aggccatggctgatatcgatccgaattcgagctccgctcg |                               |
|                                   | MST_EMSA_Complement  | cgacggagctcgaattcgatccgatatcagccatggcct  |                               |

## Sup. Table 2

*Supplementary Table 2. List of Gene identifiers used to make sequence logo in Figure 2D. Lig Es were identified by downloading all sequences in the NCBI non-redundant database possessing only pfam domains O1068 and 14743 and no other large N- or C-terminal extensions (greater than 40 amino acids). Only sequences from bacteria were considered, and sequences were further curated by removing those with insert regions corresponding to the Chlorella Virus latch.*

108762460:1, 109698685:2, 110648674:2, 113461467:2, 113889205:2, 114551501:0, 114562661:1, 119767630:1, 119899420:2, 120326449:1, 120559174:2, 120593889:2, 121548580:0, 121555068:1, 121612332:1, 124115978:0, 124121829:0, 124259327:1, 125997283:1, 126630889:0, 127512516:1, 144979615:0, 144986314:0, 145269720:0, 145274058:0, 145845815:0, 145964533:1, 148836184:0, 148871386:0, 148874515:0, 149358125:0, 150423565:0, 151937452:3, 152939420:2, 152978858:1, 153000363:1, 154148219:1, 154174003:1, 157847332:2, 159175300:1, 160875001:1, 161327552:0, 161594697:1, 167623672:1, 170718422:1, 170776838:1, 197334485:2, 207085038:1, 212557346:1, 217505866:2, 218322528:1, 218767380:1, 219549110:1, 222538303:2, 222878442:0, 223693030:2, 224942385:0, 224953110:0, 229333193:0, 229337210:0, 229342399:0, 229343247:0, 229347650:0, 229375171:0, 237865724:0, 239522875:0, 240296784:0, 241320825:0, 241366113:0, 24373759:2, 251792811:1, 253511228:1, 254667684:2, 254671206:0, 254673752:0, 255050284:0, 255299477:0, 257048132:2, 257441177:0, 257450691:0, 258519633:0, 260092246:0, 260094744:0, 260221552:0, 260604903:0, 260611937:0, 260616419:0, 260631813:0, 261310137:0, 261312662:0, 262219625:0, 268161204:0, 268586712:0, 268625894:0, 268680415:1, 269145004:0, 269826815:0, 269832545:0, 283791555:0, 283794757:0, 288566625:0, 288895391:1, 291309676:0, 294340788:2, 296838385:0, 297258919:1, 297536704:0, 298282314:0, 304337340:0, 307630526:1, 308274374:0, 309370727:0, 309751174:1, 309973353:1, 311696348:1, 313005086:1, 313128330:0, 315014568:2, 315477350:0, 315479499:0, 315480589:0, 317432855:2, 319786663:1, 319793503:1, 319999433:3, 322118447:0, 323313079:0, 323315918:0, 325127326:0, 325129366:0, 325135279:0, 325143605:0, 325159671:1, 325201096:2, 327464770:0, 327467512:0, 327484167:1, 328492291:0, 329310973:2, 330722467:0, 332038463:0, 332040004:0, 332110909:0, 332975175:0, 333442403:0, 333477997:1, 333788494:0, 337256912:2, 339885800:0, 340046316:0, 340553674:2, 341949603:0, 341950773:0, 341952540:0, 341954193:1, 341956210:0, 342327970:0, 342793473:0, 342794915:0, 342800104:1, 342803026:0, 342814006:1, 343393084:0, 343922740:0, 343968627:0, 343970757:0, 344223456:0, 345124272:0, 345429798:2, 345471252:2, 347814584:0, 347992773:0, 348010987:0, 348013602:0, 348030192:2, 348609746:0, 348654560:0, 349795096:0, 356447824:0, 356485893:0, 357224757:0, 357418692:1, 359355653:1, 359755462:0, 363417033:0, 363650660:0, 364577889:0, 371494272:0, 371758385:0, 374569211:0, 375130926:1, 37679818:3, 380518440:0, 380522746:0, 380524289:0, 380547839:0, 380562183:0, 380576237:0, 380598228:0, 380605437:0, 380618743:0, 380625359:0, 380631125:0, 380631893:0, 380644329:0, 380646912:0, 380648026:0, 380653481:0, 38067079:0, 380660095:0, 380676879:0, 380833337:0, 381341012:1, 383759117:2, 384155360:1, 384578144:0, 385193162:0, 385280912:1, 385695510:0, 385697466:0, 386313535:1, 386324941:2, 38676245:0, 386903442:0, 386905425:0, 386909012:0, 389402845:0, 389606800:0, 390427927:1, 390941000:2, 391859872:0, 392605313:0, 395940738:0, 395951730:0, 395953387:0, 396087060:0, 398085940:1, 398096489:0, 400377745:0, 402314832:0, 402315133:0, 402320923:0, 402328990:0, 402334157:0, 402339080:0, 402342830:0, 406595607:2, 407207921:0, 407254106:1, 407289846:1, 407717391:2, 407766070:0, 408024741:0, 408032471:0, 408876000:0, 408886029:1, 408897334:0, 410817639:1, 421960779:0, 429161732:0, 429227365:0, 432200730:0, 432245331:0, 441428075:0, 444243277:0, 444507245:0, 446831227:1, 446831232:1, 451931819:0, 452086336:0, 459278227:0, 469611768:0, 469675993:0, 469740180:0, 473828414:1, 476415868:2, 478443157:0, 478290958:0, 479293810:1, 479290989:0, 479298992:0, 479304517:0, 485369548:0, 485371702:0, 487813709:1, 488493776:1, 488958630:0, 489014976:1, 493693947:1, 493844358:1, 494254078:1, 494855212:0, 494922432:1, 495384871:0, 495390444:1, 495402835:0, 495409996:0, 495740102:0, 496174095:1, 496439758:1, 497235787:1, 499159468:0, 499540372:3, 499581254:2, 499942220:2, 500036612:2, 500129912:2, 500198005:2, 500863814:2, 501017387:2, 501509354:2, 501545495:2, 501583519:2, 502270739:2, 502816860:2, 503284845:2, 503337192:1, 503426423:2, 503511113:2, 503518072:2, 503622783:2, 503916277:2, 503997788:2, 504058922:2, 504387185:2, 504517458:2, 504519037:2, 504685824:2, 504810245:2, 504827579:2, 505245903:2, 508731256:0, 511531095:1, 514068023:0, 514213579:0, 519121900:0, 519729731:0, 519734778:0, 521321957:2, 521331215:1, 522588844:1, 52424994:3, 525951466:2, 526460051:1, 527845967:0, 528051668:0, 528865392:0, 529063827:1, 530446374:1, 530900685:0, 530920525:0, 531075339:0, 532689335:1, 536749218:0, 537385543:2, 540223626:0, 540254565:0, 540265980:0, 540275439:0, 540287581:0, 540291155:0, 540299115:0, 541484295:0, 543112574:0, 543203743:0, 543204697:0, 543206092:0, 543210800:0, 543211050:0, 543212186:0, 543942448:2, 543997526:2, 544270561:1, 545092018:2, 548710279:0, 548719101:0, 550663513:0, 550669293:0, 550678117:0, 550687597:0, 550784566:0, 553946255:0, 556854727:2, 556909054:0, 564137010:0, 56461154:2, 564723455:0, 564726596:0, 56479461:2, 566042285:1, 566128547:1, 567328127:0, 567931867:1, 57016433:0, 570731467:0, 572102750:0, 575442715:0, 575444850:0, 575448172:0, 575449292:0, 575455037:0, 575466035:0, 584422161:0, 584427168:0, 586630466:0, 589590181:0, 589833550:0, 589849863:0, 589862263:0, 589867941:0, 594554674:0, 597958196:0, 59802342:1, 613771959:3, 613603118:0, 631603948:0, 631604902:0, 631607056:0, 631610171:0, 631613891:0, 631614913:0, 631619493:0, 631621339:0, 631621378:0, 6363290206:0, 63647255:0, 633468462:1, 636861769:4, 636864101:0, 694338135:0, 694342493:0, 694346809:0, 694866688:2, 695267158:1, 696159977:1, 696169936:1, 696250674:1, 699263904:0, 699270081:0, 700286800:1, 700655470:0, 702394408:0, 702396891:1, 702411633:0, 703561754:2, 703566574:0, 703605353:3, 703612352:0, 703618279:0, 704010822:0, 706089265:1, 71147864:1, 71906874:1, 719383128:1, 720062506:1, 722085810:1, 723632602:1, 725529600:0, 736316772:1, 736609839:1, 73696000:0, 737250863:1, 737480016:1, 738610062:1, 739113611:1, 740373965:1, 74056325:1, 745807338:0, 746003614:1, 746012724:1, 746014644:1, 746026635:1, 746026635:1, 746104999:1, 746401036:1, 746420514:1, 747184865:11, 76876011:1, 78486013:2, 78497323:1, 81353134:2, 84379502:0, 85836232:0, 85840703:0, 86162400:0, 88817562:0, 89900229:1, 90327823:0, 90441034:0, 91191251:0, 91788281:2, 94426272:1,

### Sup. Table 3

Supplementary Table 3. Functional conservation of interactions between the linker region and catalytic domain in a selection of Lig E proteins. For details of interactions see Figure 5 of main text. Name abbreviations are: Hin-lig, *Haemophilus influenzae*; Nme-lig, *Neisseria meningitidis*; Vch-lig, *Vibrio cholera*; Vib-lig, *Aliivibrio salomicida*.

| Protein | <b>Polar interactions</b> |             |          |      |     | <b>Hydrophobic interactions</b> |      |      |      |
|---------|---------------------------|-------------|----------|------|-----|---------------------------------|------|------|------|
|         | N144 - K176               | K176 - E152 | E178-N10 |      |     | Y11                             | F140 | F177 | F247 |
| Psy-Lig | N144                      | K176        | E152     | E178 | N10 | Y11                             | F140 | F177 | F247 |
| Ama-Lig | E                         | Q           | E        | E    | Q   | Y                               | E    | F    | F    |
| Hin-Lig | A                         | T           | E        | R    | T   | Y                               | Y    | A    | F    |
| Nme-Lig | K                         | S           | E        | Y    | E   | Y                               | M    | Q    | F    |
| Vch-Lig | D                         | R           | E        | Q    | N   | Y                               | L    | H    | F    |
| Vib-Lig | E                         | K           | E        | Y    | S   | Y                               | L    | H    | F    |
| Par-Lig | E                         | P           | E        | L    | V   | Y                               | T    | Y    | F    |
